# Supplementary material
Source: PubMed Central journal article supplement (PMC7209946)
Supplement: rstb20190401supp1.pdf [file rstb20190401supp1.pdf]

Supplementary material for Phil. Trans. R. Soc. B. article

Overexpression of chloroplast-targeted ferrochelatase 1  
results in a *genomes uncoupled* chloroplast-to-nucleus  
retrograde signalling phenotype

**Mike Page<sup>1</sup>, Tania Garcia-Becerra<sup>1</sup>, Alison Smith<sup>2</sup>, Matthew Terry<sup>1</sup>**

**<sup>1</sup>School of Biological Sciences, University of Southampton, Highfield  
Campus, Southampton SO17 1BJ**

**<sup>2</sup>Department of Plant Sciences, University of Cambridge, Cambridge  
CB2 3EA, UK**

**Table S1.** Primers used for molecular cloning of *FC1* and genotyping of transgenic plants.

| Reaction | Purpose                                                                                                                                                                                          | Primer | Primer sequences (5' > 3')                    |
|----------|--------------------------------------------------------------------------------------------------------------------------------------------------------------------------------------------------|--------|-----------------------------------------------|
| 1        | Amplification of <i>FC1:spGFP</i> , to remove the native FC1 transit peptide and add a BglIII restriction site at the 5' end of the amplicon.                                                    | A      | <u>AGATCT</u> GCTAAAGCACGTTCTCATG             |
|          |                                                                                                                                                                                                  | B      | GCTCTTATTTGTATAGTTCATCCATGC                   |
| 2        | Re-amplification of the amplicon obtained in reaction 1, to add <i>attB</i> Gateway® recombination sites at each end (step 1 of a two-step reaction).                                            | C      | <u>AAAAGCAGGCTCA</u> <u>AGATCT</u> GCTAAAGCAC |
|          |                                                                                                                                                                                                  | D      | <u>GAAAGCTGGGCT</u> TTATTTGTATAGTTCATCC       |
| 3        | Re-amplification of the amplicon obtained in reaction 1, to add <i>attB</i> Gateway® recombination sites at each end (step 2 of a two-step reaction).                                            | E      | <u>GGGGACAAGTTTGTACAAAAAAGCAGGCT</u>          |
|          |                                                                                                                                                                                                  | F      | <u>GGGGACCACTTTGTACAAGAAAGCTGGGT</u>          |
| 4        | Amplification of the RecA transit peptide, to add BglIII restriction sites at both ends of the amplicon.                                                                                         | G      | <u>AGATCT</u> ATGGATTCACAGCTAGTCTTG           |
|          |                                                                                                                                                                                                  | H      | <u>AGATCT</u> TCTGTCATCGAATTCAGAAC            |
| 5        | Amplification of the CoxIV transit peptide, to add BglIII restriction sites at both ends of the amplicon.                                                                                        | I      | <u>AGATCT</u> ATGCTTTCACCTACGCTCAATCT         |
|          |                                                                                                                                                                                                  | J      | <u>AGATCT</u> GGGTTTTTGTCTGAAGCAGA            |
| 6        | Amplification of <i>RecA:spGFP</i> , to add <i>attB</i> Gateway® recombination sites at each end (step 1 of a two-step reaction).                                                                | K      | <u>AAAAGCAGGCTAC</u> ATGGATTCACAGCTAG         |
|          |                                                                                                                                                                                                  | D      | <u>GAAAGCTGGGCT</u> TTATTTGTATAGTTCATCC       |
| 7        | Amplification of <i>RecA:spGFP</i> from the amplicon obtained in reaction 6, to add <i>attB</i> Gateway® recombination sites at each end (step 2 of a two-step reaction).                        | E      | <u>GGGGACAAGTTTGTACAAAAAAGCAGGCT</u>          |
|          |                                                                                                                                                                                                  | F      | <u>GGGGACCACTTTGTACAAGAAAGCTGGGT</u>          |
| 8        | Amplification of <i>CoxIV:spGFP</i> , to add <i>attB</i> Gateway® recombination sites at each end (step 1 of a two-step reaction).                                                               | L      | <u>AAAAGCAGGCTAC</u> ATGGTTTCACTACGTC         |
|          |                                                                                                                                                                                                  | D      | <u>GAAAGCTGGGCT</u> TTATTTGTATAGTTCATCC       |
| 9        | Amplification of <i>CoxIV:spGFP</i> from the amplicon obtained in reaction 8, to add <i>attB</i> Gateway® recombination sites at each end (step 2 of a two-step reaction).                       | E      | <u>GGGGACAAGTTTGTACAAAAAAGCAGGCT</u>          |
|          |                                                                                                                                                                                                  | F      | <u>GGGGACCACTTTGTACAAGAAAGCTGGGT</u>          |
| 10       | Amplification of the full-length <i>FC1</i> coding sequence (FL- <i>FC1</i> ) fused to <i>GFP</i> , to add <i>attB</i> Gateway® recombination sites at each end (step 1 of a two-step reaction). | M      | <u>AAAAGCAGGCTCA</u> ATGCAGGCAACGG            |
|          |                                                                                                                                                                                                  | D      | <u>GAAAGCTGGGCT</u> TTATTTGTATAGTTCATCC       |
| 11       | Amplification of FL- <i>FC1</i> fused to <i>GFP</i> from the amplicon obtained in reaction 10, to add <i>attB</i> Gateway® recombination sites at each end (step 2 of a two-step reaction).      | E      | <u>GGGGACAAGTTTGTACAAAAAAGCAGGCT</u>          |
|          |                                                                                                                                                                                                  | F      | <u>GGGGACCACTTTGTACAAGAAAGCTGGGT</u>          |
| 12       | Genotyping <i>RecA:FC1:GFP</i> transgenic lines. Product size = 560 bp.                                                                                                                          | N      | GGATTCACAGCTAGTCTTGTCTCTG                     |
|          |                                                                                                                                                                                                  | O      | CCTCCTCAGTGAACGGATACC                         |
| 13       | Genotyping <i>CoxIV:FC1:GFP</i> transgenic lines. Product size = 416 bp.                                                                                                                         | P      | CAAGCCAGCCACAAGAACCTTG                        |
|          |                                                                                                                                                                                                  | O      | CCTCCTCAGTGAACGGATACC                         |
| 14       | Genotyping <i>RecA:GFP</i> and <i>CoxIV:GFP</i> transgenic lines. Product sizes = 447 bp and 330 bp respectively.                                                                                | Q      | GGATGACGCACAATCCCACATATC                      |
|          |                                                                                                                                                                                                  | R      | CAAGAATTGGGACAACCTCCAG                        |
| 15       | Genotyping FL- <i>FC1:GFP</i> transgenic lines. Product size = 783 bp.                                                                                                                           | Q      | GGATGACGCACAATCCCACATATC                      |
|          |                                                                                                                                                                                                  | O      | CCTCCTCAGTGAACGGATACC                         |

Restriction enzyme recognition sites within primer sequences are given in blue text. Gateway® *att* recombination sequences (including any extra bases to maintain reading frames) within primers are underlined.

**Table S2.** Information on the plasmids used and created during molecular cloning of *FC1*.

| Plasmid name                 | Insert name          | Parent plasmid/ amplicon                                  | <i>Arabidopsis</i> lines | Notes                                                                                                     | Reference                    |
|------------------------------|----------------------|-----------------------------------------------------------|--------------------------|-----------------------------------------------------------------------------------------------------------|------------------------------|
| pGEM <sup>®</sup> -T Easy    |                      |                                                           |                          | TA cloning plasmid (Amp <sup>R</sup> ).                                                                   | Promega                      |
| pDONR <sup>™</sup> 221       |                      |                                                           |                          | Gateway <sup>®</sup> cloning plasmid (Kan <sup>R</sup> ).                                                 | Invitrogen <sup>™</sup>      |
| pGWB502Ω                     |                      |                                                           |                          | Gateway <sup>®</sup> destination plasmid (Spec <sup>R</sup> ). The plant selectable marker is hygromycin. | Nakagawa <i>et al</i> (2007) |
| pGEM <sup>®</sup> -T FC1-GFP | <i>FC1:GFP</i>       | pGEM <sup>®</sup> -T Easy & reaction 1                    |                          | Subcloning of <i>FC1:GFP</i> (no native transit peptide).                                                 |                              |
| pENTR FC1-GFP                | <i>FC1:GFP</i>       | pDONR <sup>™</sup> 221 & reaction 3                       |                          | Cloning <i>FC1:GFP</i> (no native transit peptide) into a Gateway <sup>®</sup> plasmid.                   |                              |
| pGEM <sup>®</sup> -T RecA    | <i>RecA</i>          | pGEM <sup>®</sup> -T Easy & reaction 4                    |                          | Subcloning of <i>RecA</i> transit peptide.                                                                |                              |
| pGEM <sup>®</sup> -T CoxIV   | <i>CoxIV</i>         | pGEM <sup>®</sup> -T Easy & reaction 5                    |                          | Subcloning of <i>CoxIV</i> transit peptide.                                                               |                              |
| pENTR RecA-FC1-GFP           | <i>RecA:FC1:GFP</i>  | pENTR FC1-GFP & pGEM <sup>®</sup> -T RecA (BglII digest)  |                          | Ligation of <i>RecA</i> transit peptide upstream of <i>FC1:GFP</i> .                                      |                              |
| pENTR CoxIV-FC1-GFP          | <i>CoxIV:FC1:GFP</i> | pENTR FC1-GFP & pGEM <sup>®</sup> -T CoxIV (BglII digest) |                          | Ligation of <i>CoxIV</i> transit peptide upstream of <i>FC1:GFP</i> .                                     |                              |
| pGWB502Ω RecA-FC1-GFP        | <i>RecA:FC1:GFP</i>  | pENTR RecA-FC1-GFP & pGWB502Ω                             | pFC1                     | Recombination of <i>RecA:FC1:GFP</i> into a destination plasmid.                                          |                              |
| pGWB502Ω CoxIV-FC1-GFP       | <i>CoxIV:FC1:GFP</i> | pENTR CoxIV-FC1-GFP & pGWB502Ω                            | mFC1                     | Recombination of <i>CoxIV:FC1:GFP</i> into a destination plasmid.                                         |                              |
| pENTR RecA-GFP               | <i>RecA:GFP</i>      | pDONR <sup>™</sup> 221 & reaction 7                       |                          | Cloning <i>RecA:GFP</i> into a Gateway <sup>®</sup> plasmid.                                              |                              |
| pGWB502Ω RecA-GFP            | <i>RecA:GFP</i>      | pENTR RecA-GFP & pGWB502Ω                                 | pGFP                     | Recombination of <i>RecA:GFP</i> into a destination plasmid.                                              |                              |
| pENTR CoxIV-GFP              | <i>CoxIV:GFP</i>     | pDONR <sup>™</sup> 221 & reaction 9                       |                          | Cloning <i>CoxIV:GFP</i> into a Gateway <sup>®</sup> plasmid.                                             |                              |
| pGWB502Ω CoxIV-GFP           | <i>CoxIV:GFP</i>     | pENTR CoxIV-GFP & pGWB502Ω                                | mGFP                     | Recombination of <i>CoxIV:GFP</i> into a destination plasmid.                                             |                              |
| pENTR FL-FC1-GFP             | <i>FL-FC1:GFP</i>    | pDONR221 <sup>™</sup> & reaction 11                       |                          | Cloning <i>FL-FC1:GFP</i> into a Gateway <sup>®</sup> plasmid.                                            |                              |
| pGWB502Ω FL-FC1-GFP          | <i>FL-FC1:GFP</i>    | pENTR FL-FC1-GFP & pGWB502Ω                               | FLFC1                    | Recombination of <i>FL-FC1:GFP</i> into a destination plasmid.                                            |                              |

The reactions referred to in column three relate to the amplicons created in the reactions described in Supplementary Table S1.

**Table S3.** Information on the primers used for qRT-PCR analysis of gene expression.

| Gene name        | Accession No. (source) | Forward primer sequence (5' > 3') | Reverse primer sequence (5' > 3') | Amplicon length (bp) |
|------------------|------------------------|-----------------------------------|-----------------------------------|----------------------|
| <i>FC1</i>       | At5g26030 (TAIR)       | CCTGAACTCTTAACGATGTTTC            | CCACCAATAGCAGCATAACC              | 164                  |
| <i>GFP</i>       | U70496.1 (GenBank)     | GAGGACCATCTCTTTCAAGGAC            | GTTGTGGGAGTTGTAGTTGTATTC          | 163                  |
| <i>FC2</i>       | At2g30390 (TAIR)       | GCAGAGATGGAAGAATGTGTTG            | CAGTAATGGCTTCTTCAGTGATG           | 139                  |
| <i>ADF2</i>      | At3g46000 (TAIR)       | CGATTTGACTTTGTCCTGTC              | TCATCTTGTCTCTCACTTTGGC            | 95                   |
| <i>YLS8</i>      | At5g08290 (TAIR)       | GCTGAAATATCCCGTGAACG              | AATGGAGAACAACCGAAACAG             | 93                   |
| <i>GUN4</i>      | At3g59400 (TAIR)       | CAATCTCACTTCGGACCAAC              | TTGAAACGGCAGATACGG                | 121                  |
| <i>CA1</i>       | At3g01500 (TAIR)       | GCTTCTTTCTCACTTCACTTTCTC          | CAATGATAGGAGCAGGAGCG              | 189                  |
| <i>HEMA1</i>     | At1g58290 (TAIR)       | GCTTCTTCTGATTCTGCGTC              | GCTGTGTGAATACTAAGTCCAATC          | 128                  |
| <i>LHCB2*1</i>   | At2g05100 (TAIR)       | CTCCGCAAGGTTGGTGTATC              | CGGTTAGGTAGGACGGTGTAT             | 142                  |
| <i>CHLH</i>      | At5g13630 (TAIR)       | CATTGCTGACACTACAACGTC             | CTTCTCTATCTCACGAACTCCTTC          | 145                  |
| <i>RecA:FC1</i>  | Created in this study  | CTTCACTCCTCTTTCTCCTCTCT           | CAACAACATGAGAACGTGCTTTA           | 191                  |
| <i>CoxIV:FC1</i> | Created in this study  | CAAGCCAGCCACAAGAAGCTT             | CATCGTTAAGAGTTTCAGGACCA           | 146                  |

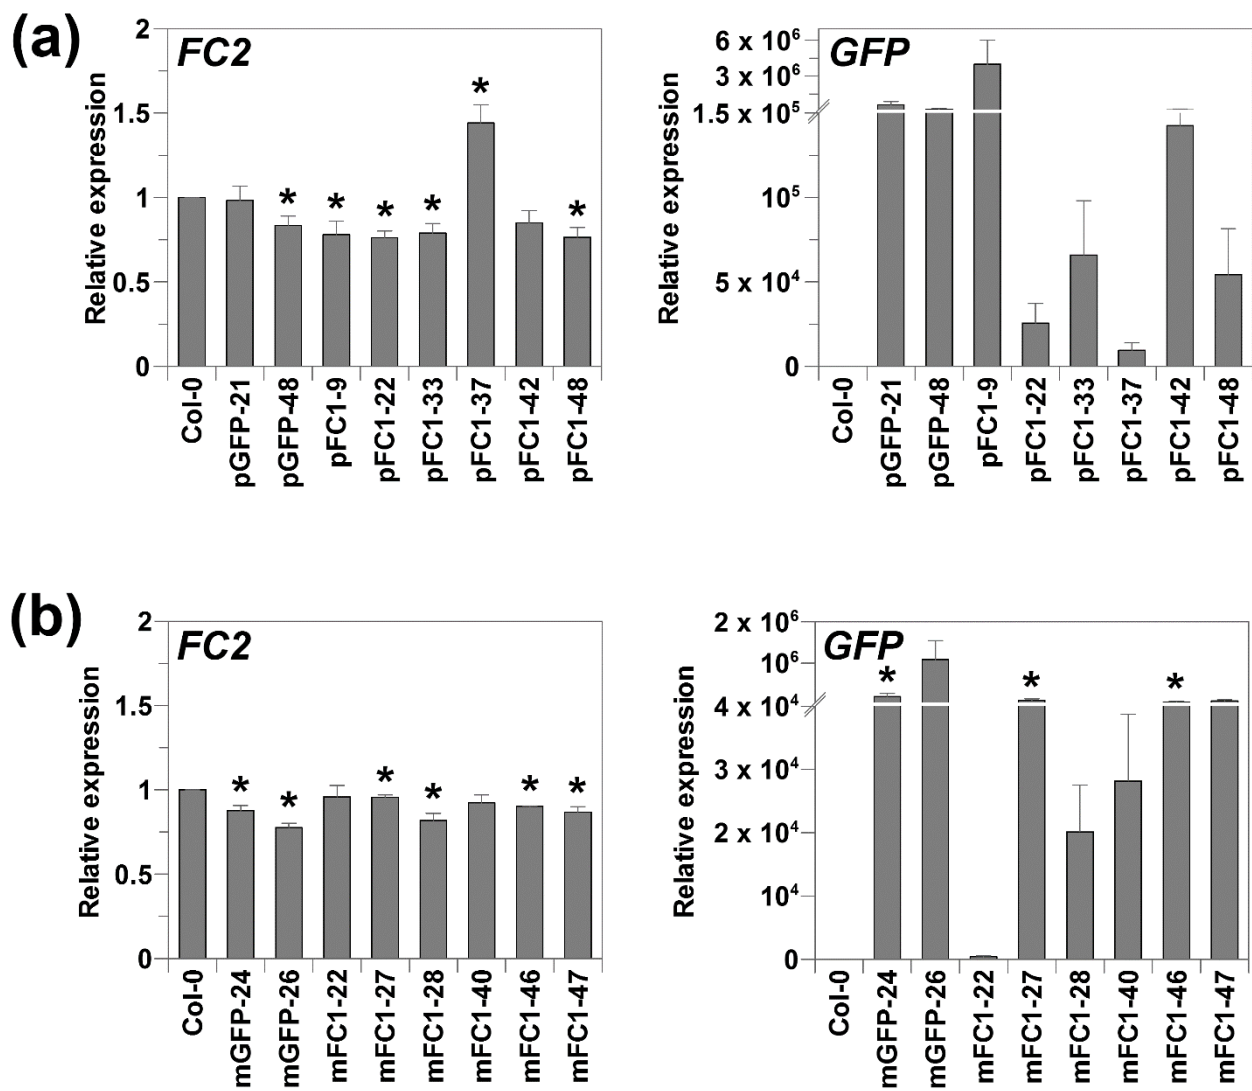

**Figure S1. Expression of *FC2* and *GFP* in *FC1* overexpressing lines.** (a,b) Expression of *FC2* and *GFP* was determined in the same pFC1 (a) and mFC1 (b) seedlings used to generate Figure 1 and is shown relative to Col-0. Lines expressing only *GFP* in plastids (pGFP) or mitochondria (mGFP) were included as controls. Data represents the mean + SEM of three independent biological replicates and asterisks indicate a significant difference vs. Col-0 ( $p < 0.05$ , Student's *t*-test).

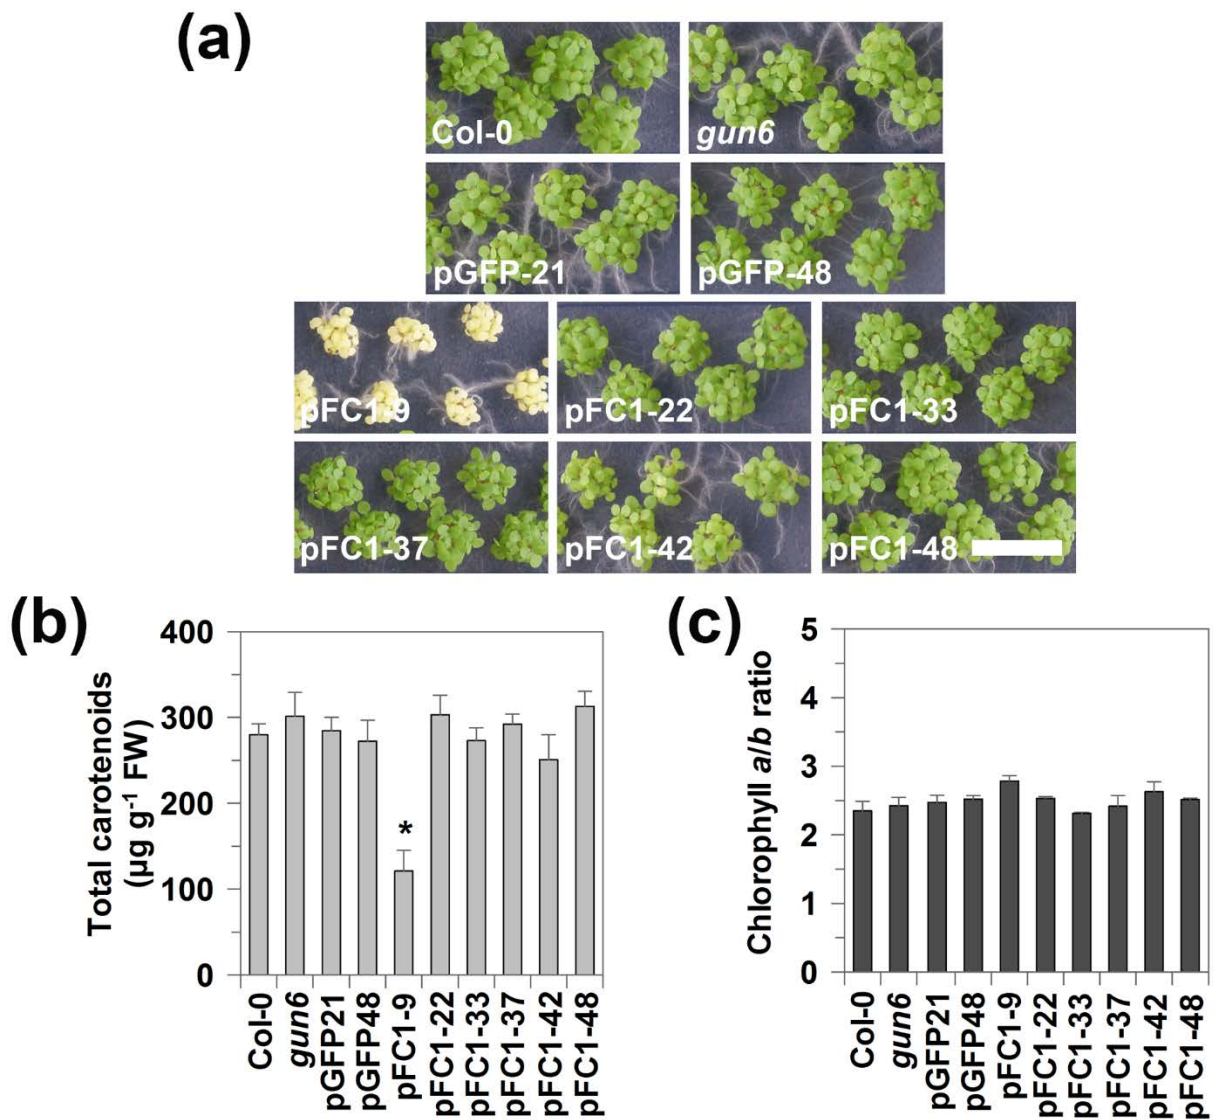

**Figure S2. Characterisation of 5 day-old WLC-grown seedlings overexpressing plastid-targeted *FC1*.** (a) Representative seedling phenotype of pFC1 and pGFP lines, bar = 10 mm. (b) Total carotenoid and (c) chlorophyll *a/b* ratio of the same transgenic lines. For (b, c), data shown is the mean + SEM of three independent biological replicates and the asterisk denotes a significant difference vs. Col-0 ( $p < 0.05$ , Student's *t*-test).

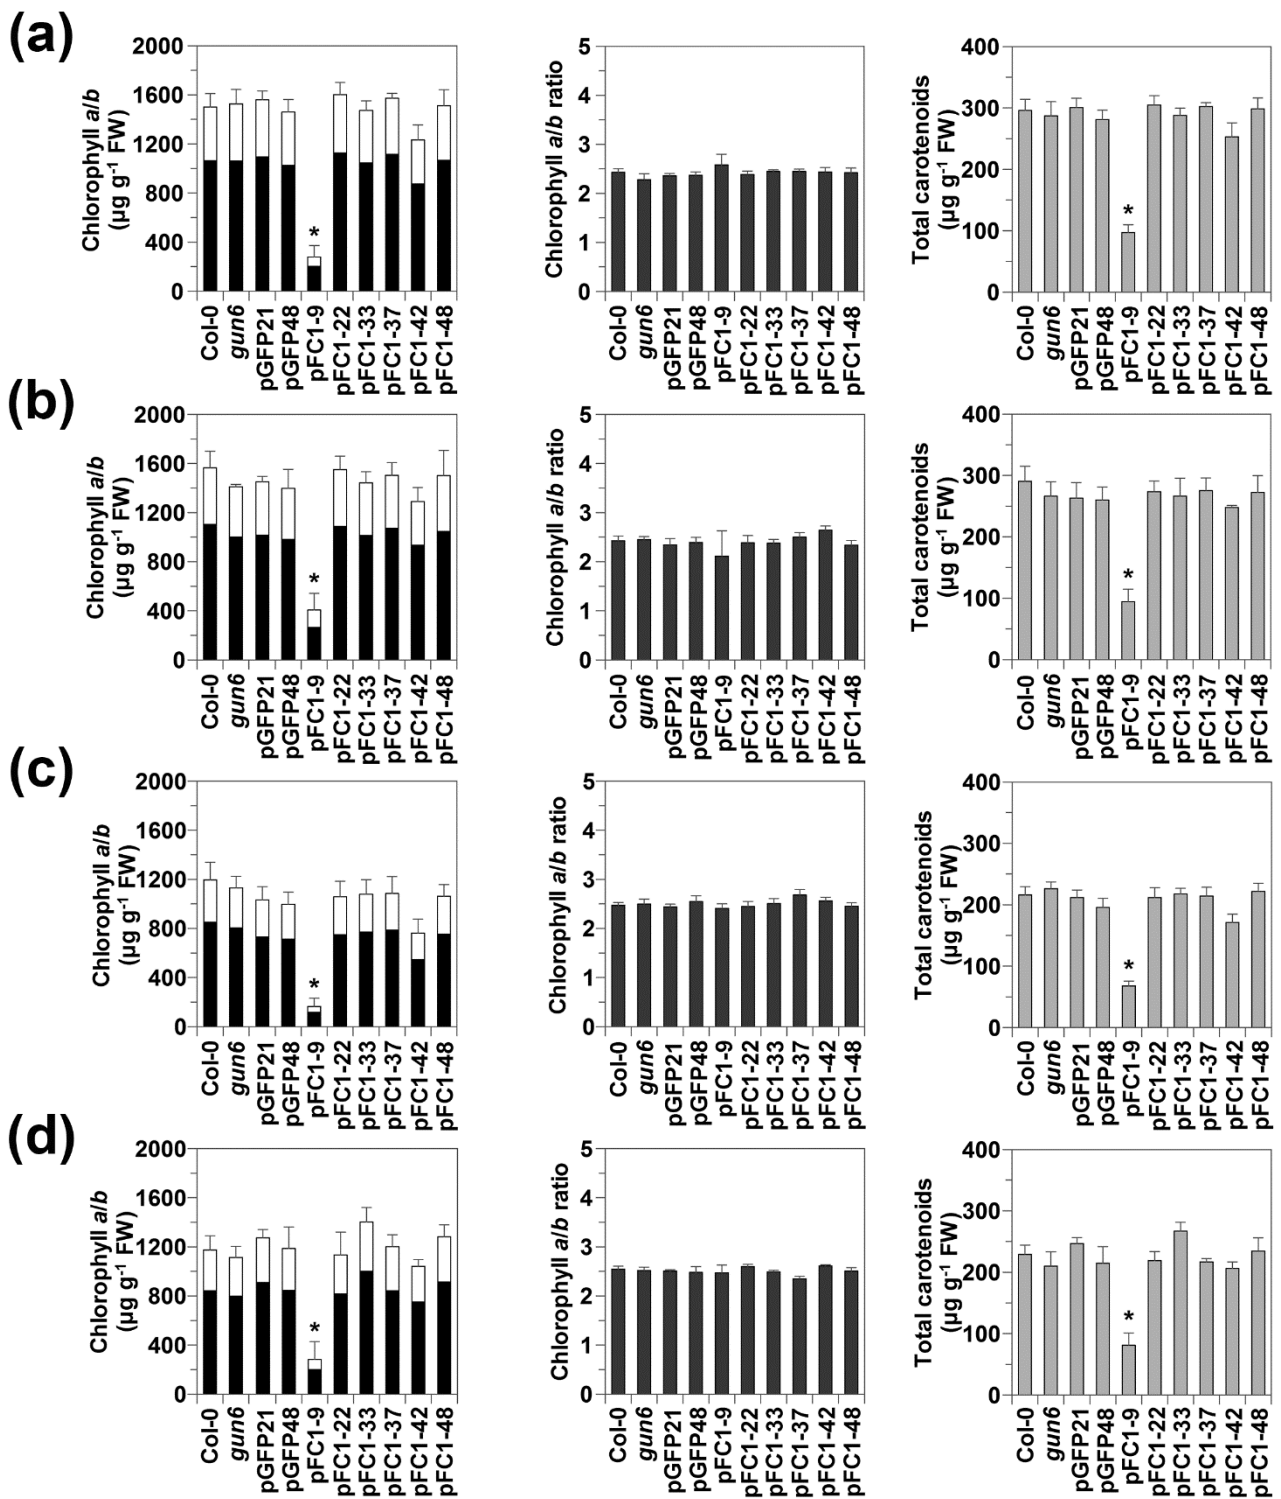

**Figure S3. Analysis of chlorophyll and carotenoid levels in pFC1 seedlings grown in different light conditions.** (a-d) Total chlorophyll, chlorophyll *a/b* ratio and total carotenoids were measured in pFC1, pGFP (control) and *gun6* 5 d-old seedlings under a range of conditions. (a) LWLc (25  $\mu\text{mol m}^{-2} \text{s}^{-1}$ ), (b) HWLc (250  $\mu\text{mol m}^{-2} \text{s}^{-1}$ ), (c) SD (8 h light, 16 h dark, 100  $\mu\text{mol m}^{-2} \text{s}^{-1}$ ), (d) LD (16 h light, 8 h dark, 100  $\mu\text{mol m}^{-2} \text{s}^{-1}$ ). For graphs of chlorophyll content, black bars represent chlorophyll *a* and white bars represent chlorophyll *b*. Data shown are the mean + SEM of three independent biological replicates and asterisks indicate a significant difference vs. Col-0 ( $p < 0.05$ , Student's *t*-test).

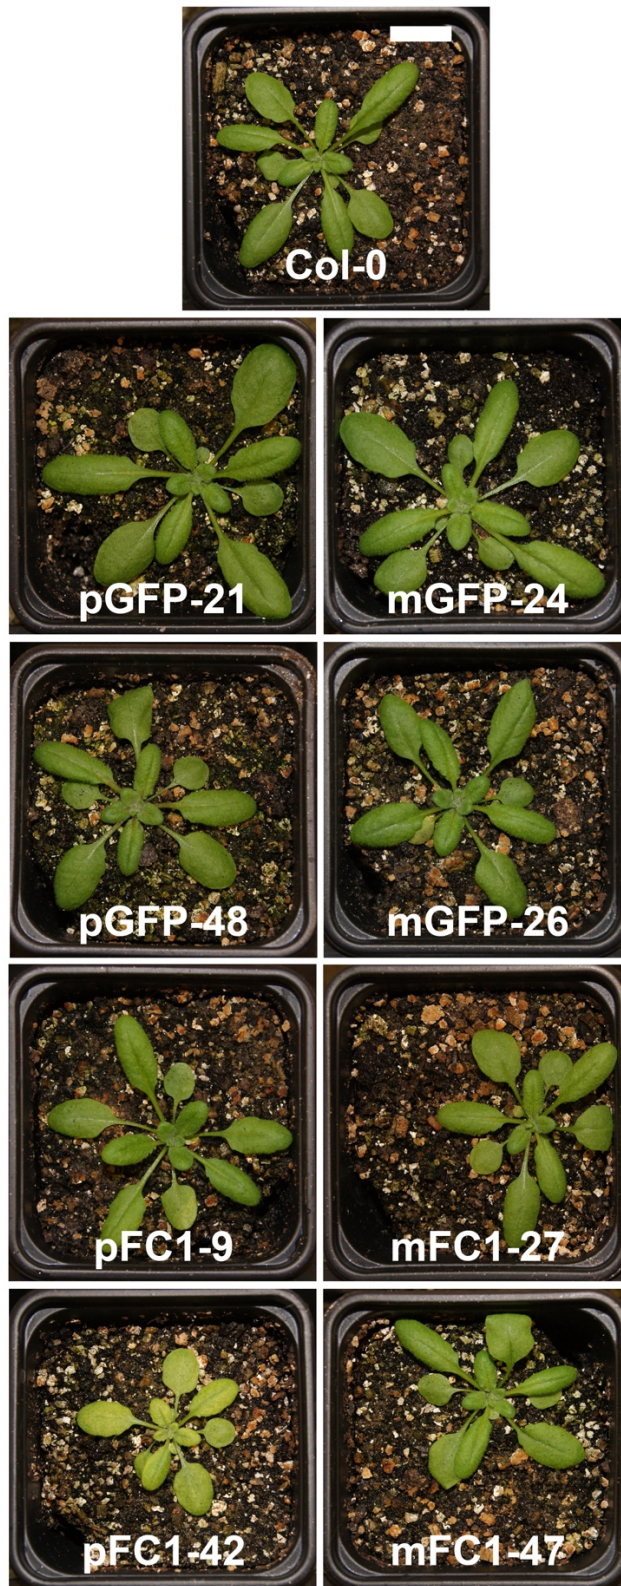

**Figure S4. Phenotype of *FC1* overexpressing lines at the rosette stage.** Representative photographs of pGFP, pFC1, mGFP and mFC1 lines. All photographs were taken 23 days after sowing (DAS), except pFC1-9 (34 DAS). Plants were grown on soil in LD conditions (16 h light, 8 h dark,  $100 \mu\text{mol m}^{-2} \text{s}^{-1}$ ), scale bar = 10 mm.



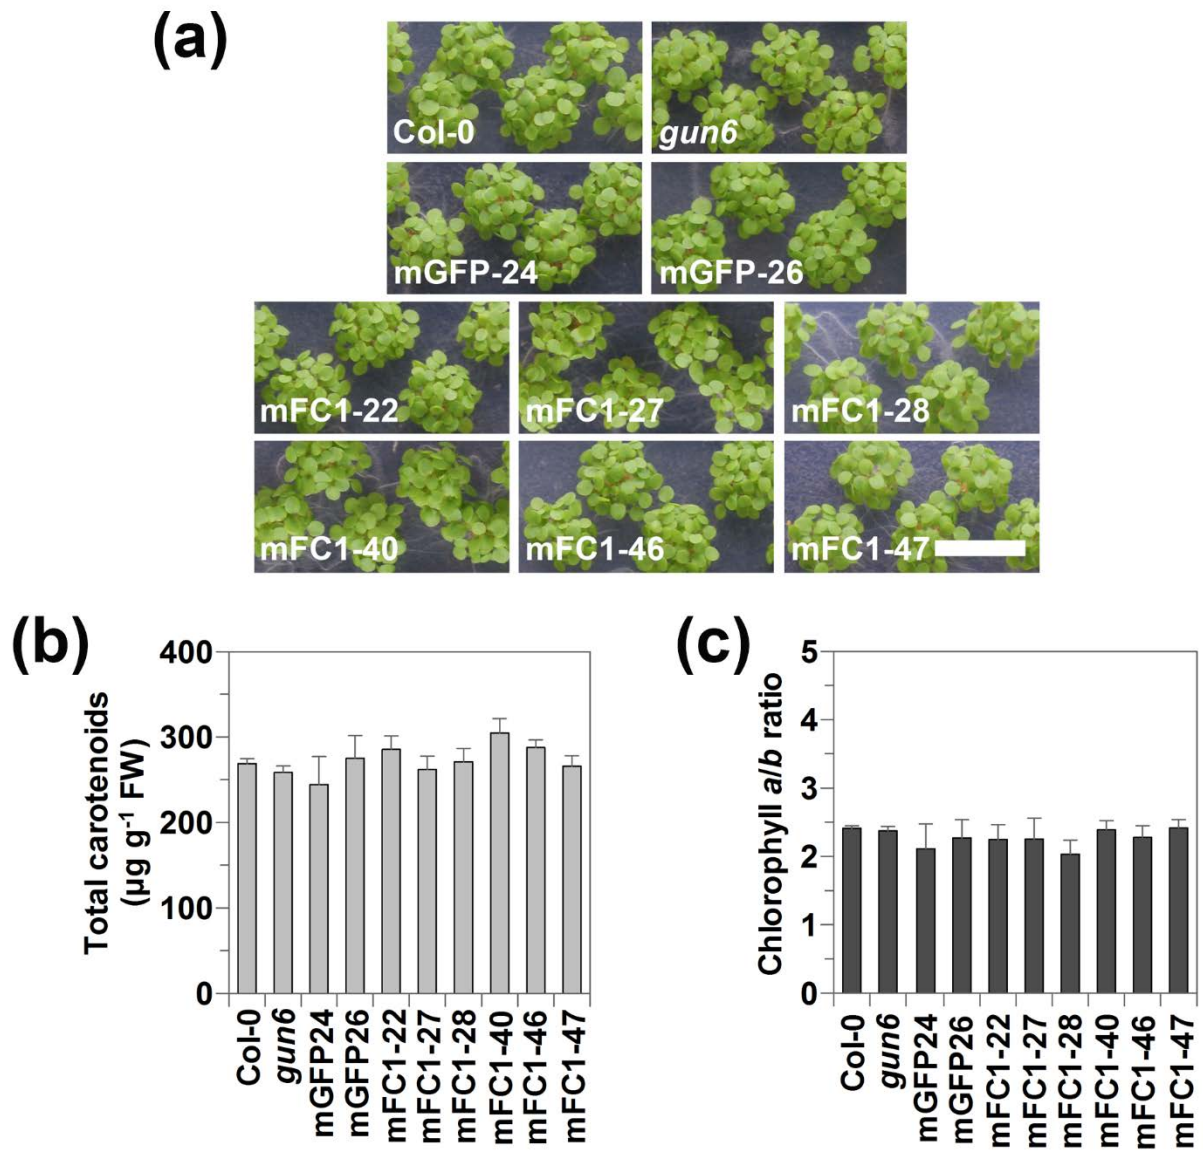

**Figure S5. Characterisation of 5 d-old WLC-grown seedlings overexpressing mitochondria-targeted FC1.** (a) Representative seedling phenotype of mFC1 and mGFP lines, bar = 10 mm. (b) Total carotenoid and (c) chlorophyll *a/b* ratio of the same transgenic lines. For (b) and (c), data shown is the mean + SEM of three independent biological replicates.

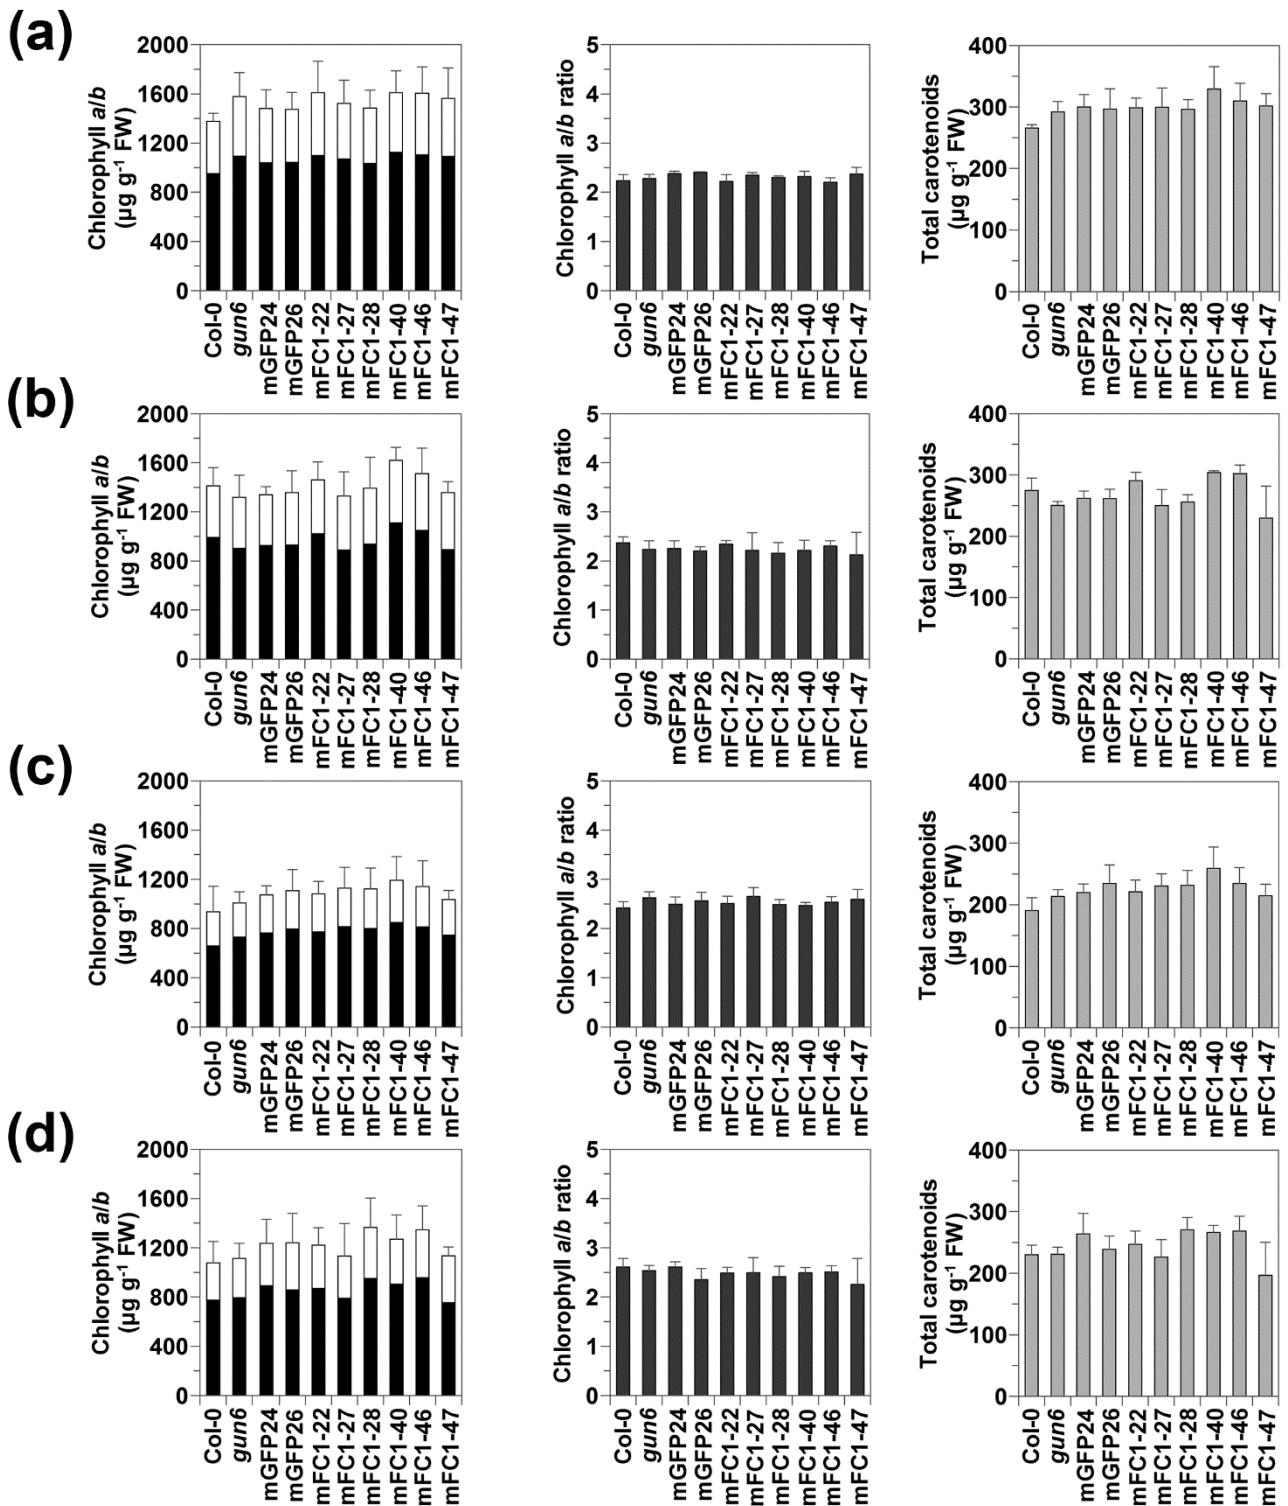

**Figure S6. Analysis of chlorophyll and carotenoid levels in mFC1 seedlings grown in different light conditions.** (a-d) Total chlorophyll, chlorophyll *a/b* ratio and total carotenoids were measured in mFC1, mGFP (control) and *gun6* 5 d-old seedlings under a range of conditions. (a) LWLc ( $25 \mu\text{mol m}^{-2} \text{s}^{-1}$ ), (b) HWLc ( $250 \mu\text{mol m}^{-2} \text{s}^{-1}$ ), (c) SD (8 h light, 16 h dark,  $100 \mu\text{mol m}^{-2} \text{s}^{-1}$ ), (d) LD (16 h light, 8 h dark,  $100 \mu\text{mol m}^{-2} \text{s}^{-1}$ ). For graphs of chlorophyll content, black bars represent chlorophyll *a* and white bars represent chlorophyll *b*. Data shown are the mean + SEM of three independent biological replicates.



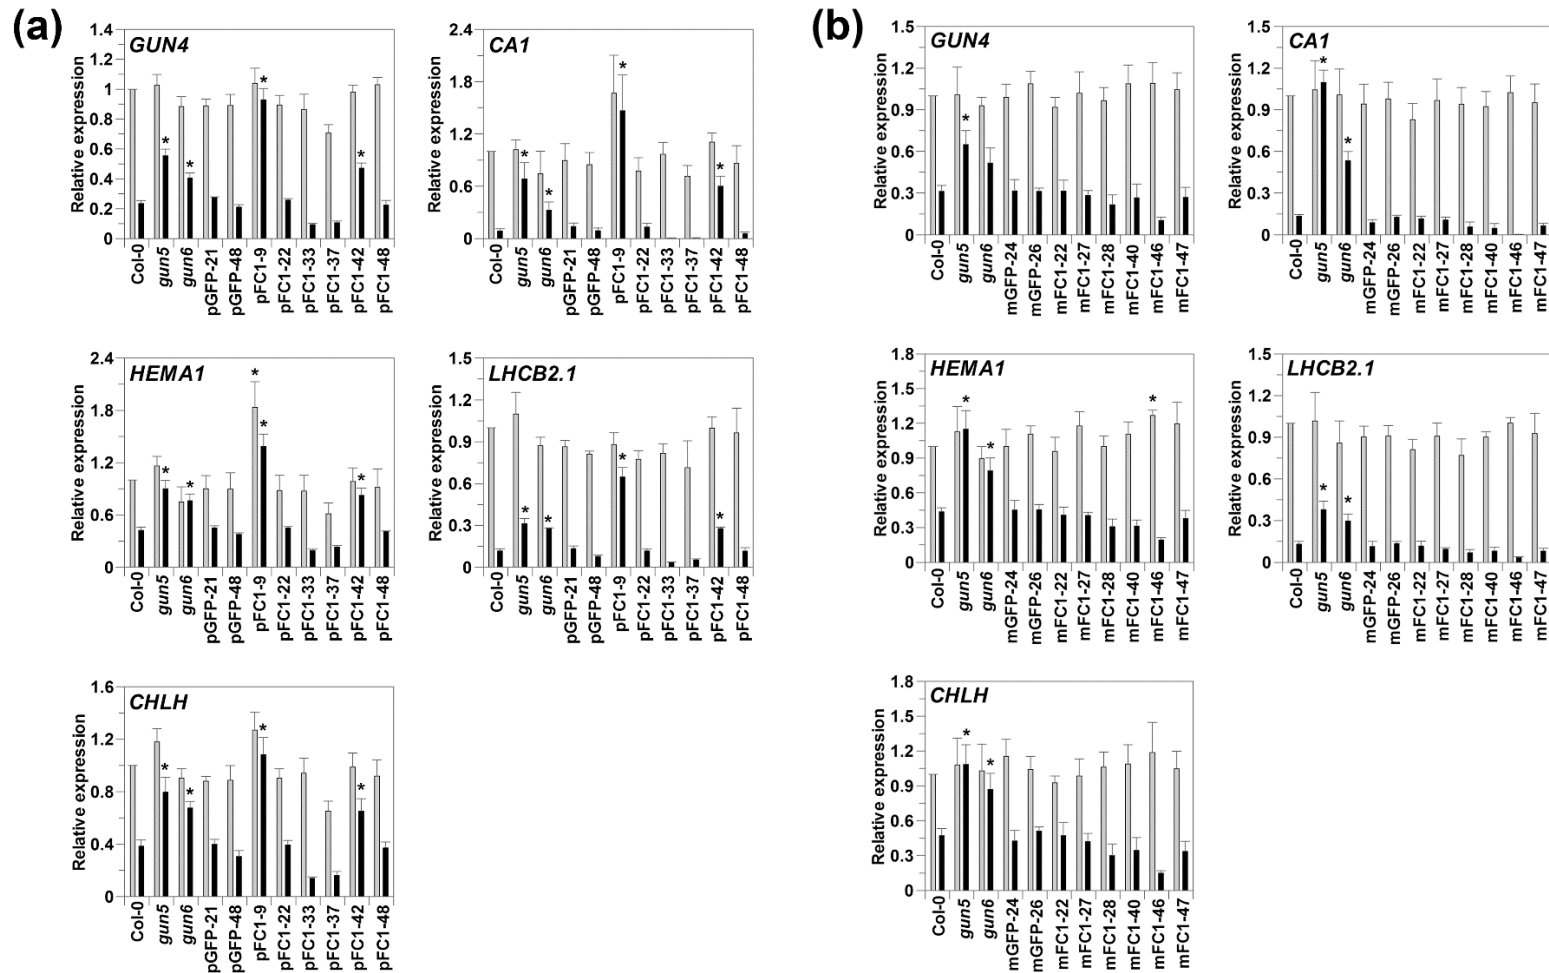

**Figure S8. Expression of photosynthesis-associated genes on NF is rescued in plastid *FC1* overexpressors, but not mitochondrial *FC1* overexpressors.** (a,b) The expression of *GUN4*, *CA1*, *HEMA1*, *LHCB2.1* and *CHLH* was determined by qRT-PCR in pFC1 (a) and mFC1 (b) seedlings grown for 7 d in LWLc on plates in the absence (grey bars) or presence (black bars) of NF. The control lines pGFP (a) and mGFP (b), as well as *gun5* and *gun6*, were included. Data shown are the mean fold changes vs. Col-0 on NF + SEM of three independent biological replicates and asterisks indicate a significant difference vs. Col-0 ( $p < 0.05$ , Student's *t*-test). The data in this figure was used to produce the graphs in Figure 3.

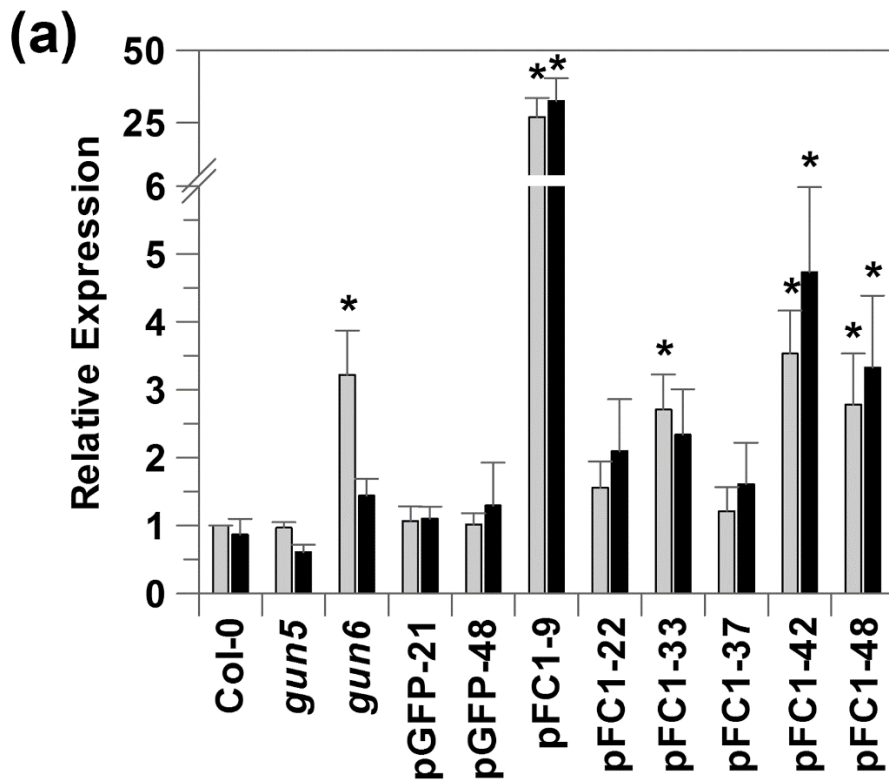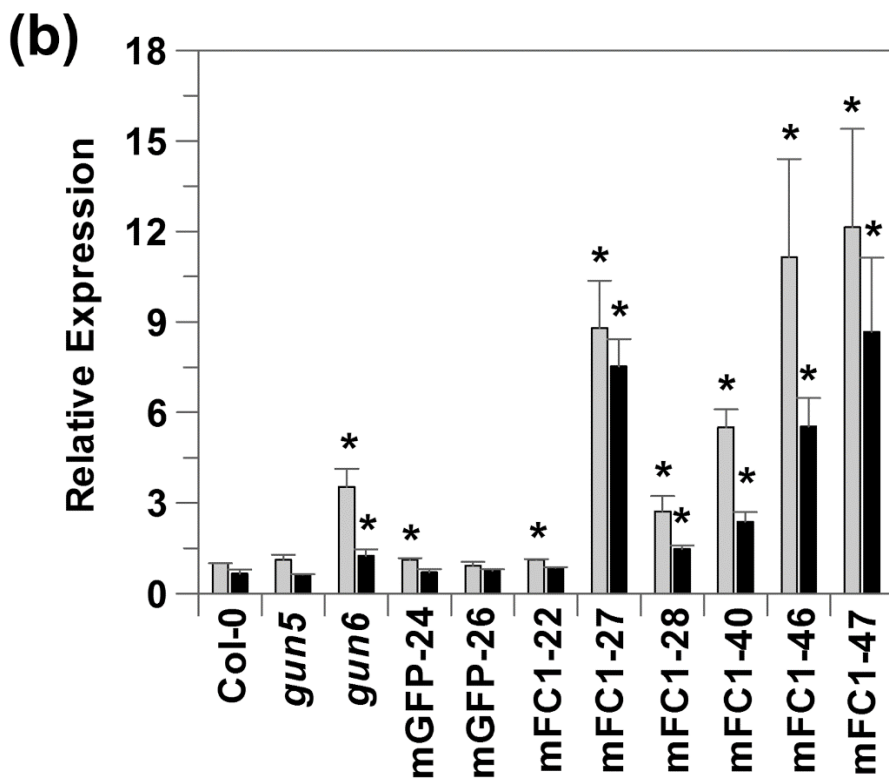

**Figure S9. FC1 expression in pFC1 and mFC1 lines in the NF screen.** (a,b) FC1 expression was determined by qRT-PCR in pFC1 (a) and mFC1 (b) seedlings in the absence (grey bars) or presence (black bars) of NF. Data represents the mean + SEM of three independent biological replicates and asterisks indicate a significant difference vs. Col-0 ( $p < 0.05$ , Student's *t*-test).

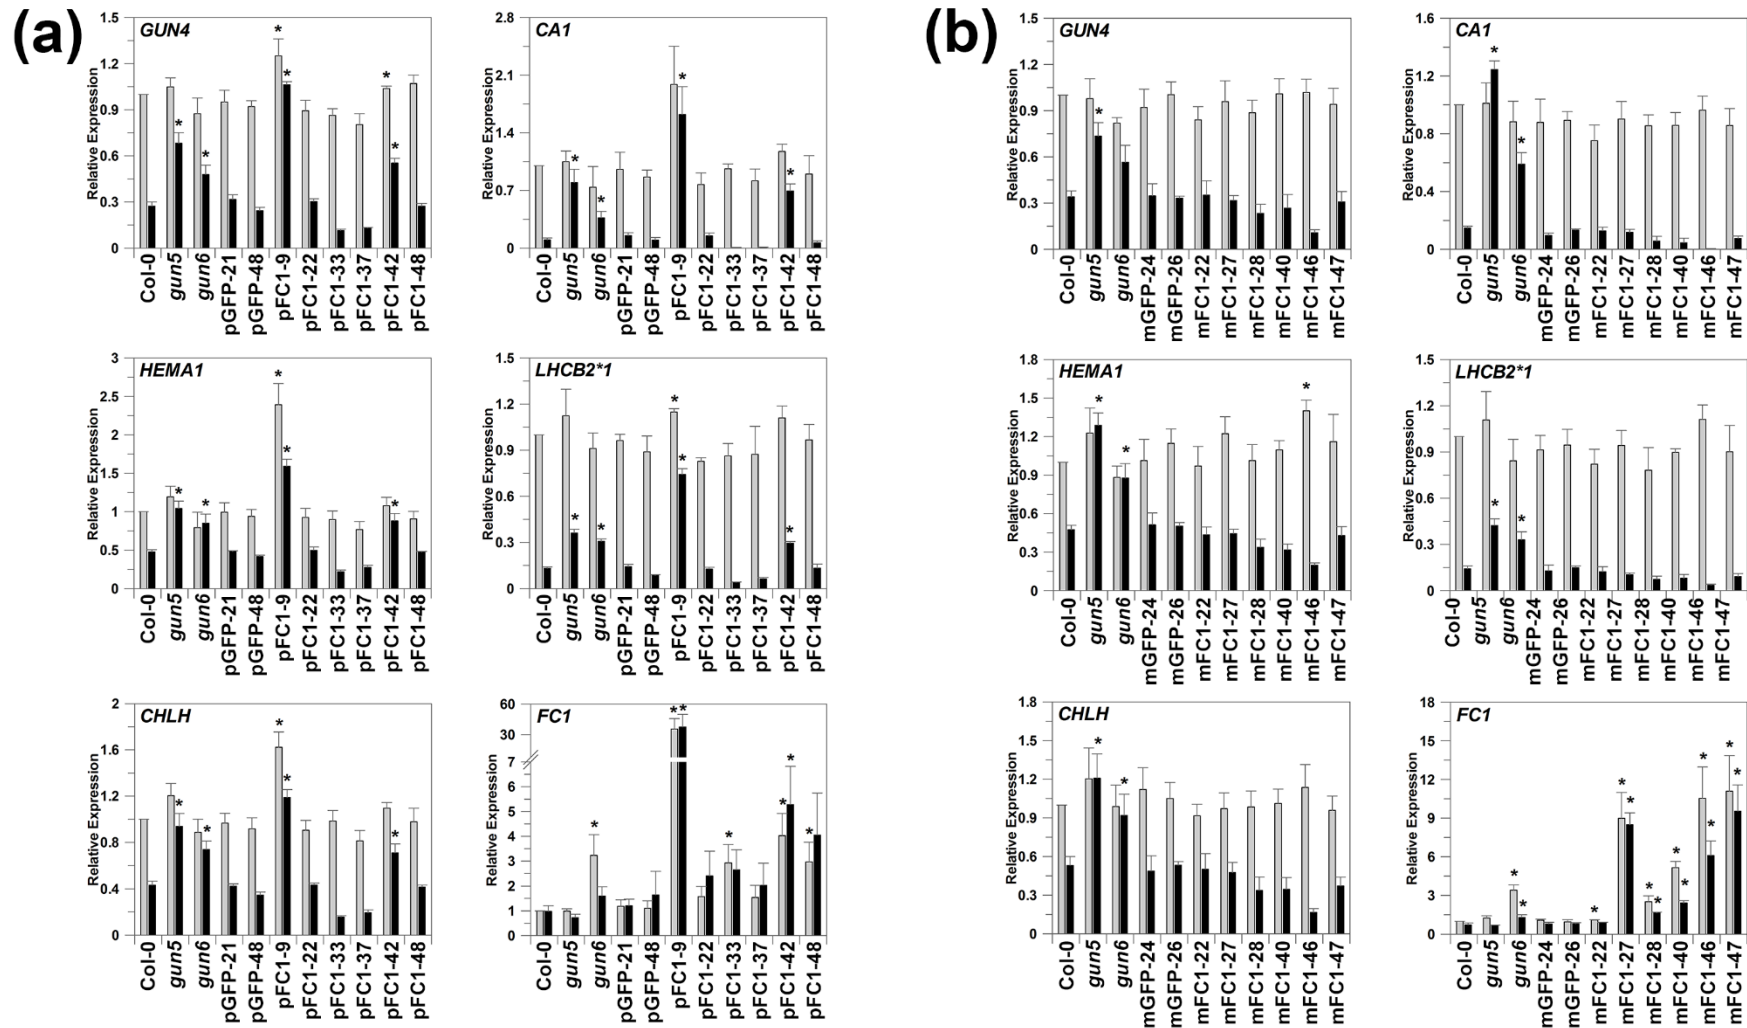

**Figure S10. Gene expression changes on NF in pFC1 seedlings are not dependent on the qRT-PCR reference gene.** (a,b) qRT-PCR data shown in electronic supplementary material figures S8 and S9 were normalised to a different reference gene, *YELLOW LEAF SPECIFIC GENE 8* (*YLS8*, At5g08290). The expression of *GUN4*, *CA1*, *HEMA1*, *LHCB2.1*, *CHLH* and *FC1* was determined by qRT-PCR in pFC1 (a) and mFC1(b) seedlings grown for 7 d in LWLc on plates in the absence (grey bars) or presence (black bars) of NF. The control lines pGFP (a) and mGFP (b), as well as *gun5* and *gun6*, were included. Data shown are the mean fold changes vs. Col-0 on NF + SEM of three independent biological replicates and asterisks indicate a significant difference vs. Col-0 ( $p < 0.05$ , Student's *t*-test).

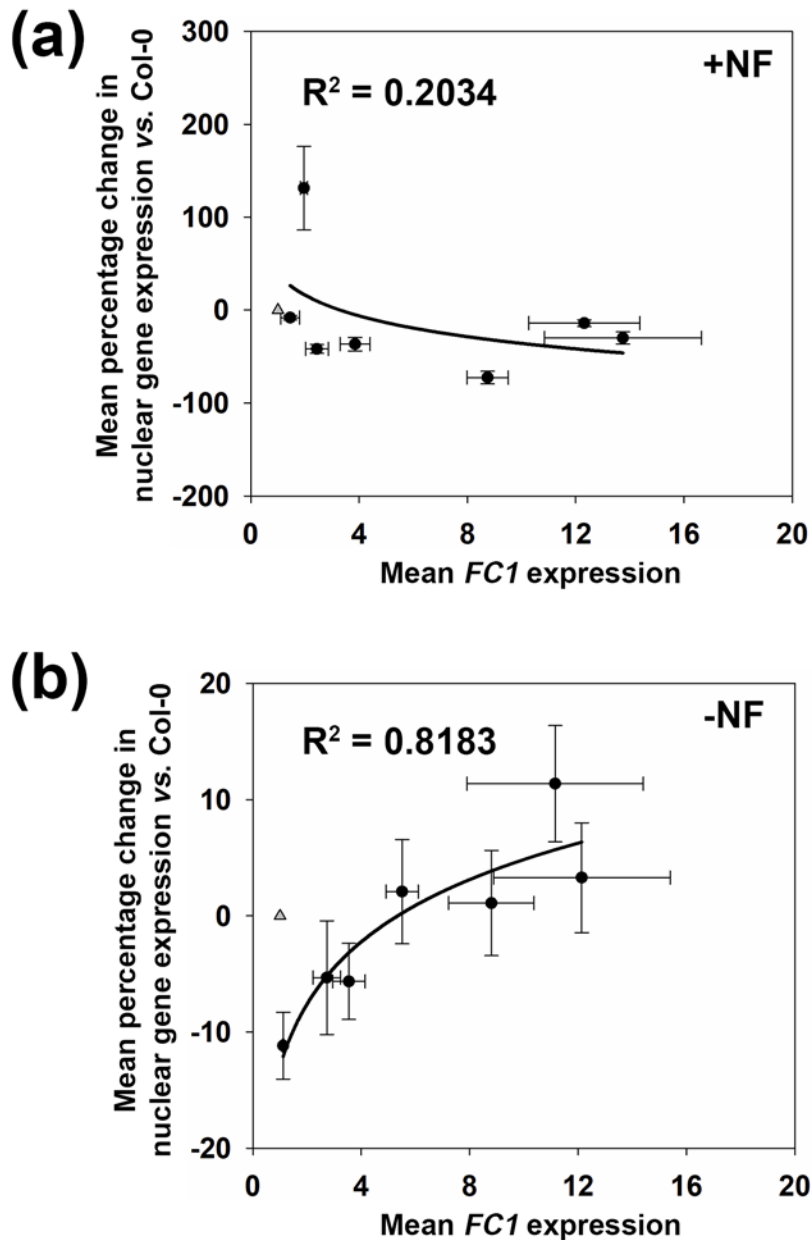

**Figure S11. Mitochondria-targeted *FC1* expression does not correlate with enhanced nuclear gene expression on NF.** Correlation plots of the combined mean percentage change in expression of *GUN4*, *CA1*, *HEMA1*, *LHCB2.1*, and *CHLH*, vs. *FC1* expression for m*FC1* seedlings in the presence (a) or absence (b) of NF. Data is relative to Col-0 +NF (a) or -NF (b). For both graphs, data points include *gun6* and the six transgenic m*FC1* overexpressing lines. The triangle indicates WT response. SigmaPlot 13.0 was used to fit logarithmic best-fit lines and derive coefficients of determination. Data shown is the mean  $\pm$  SEM of three independent biological replicates.

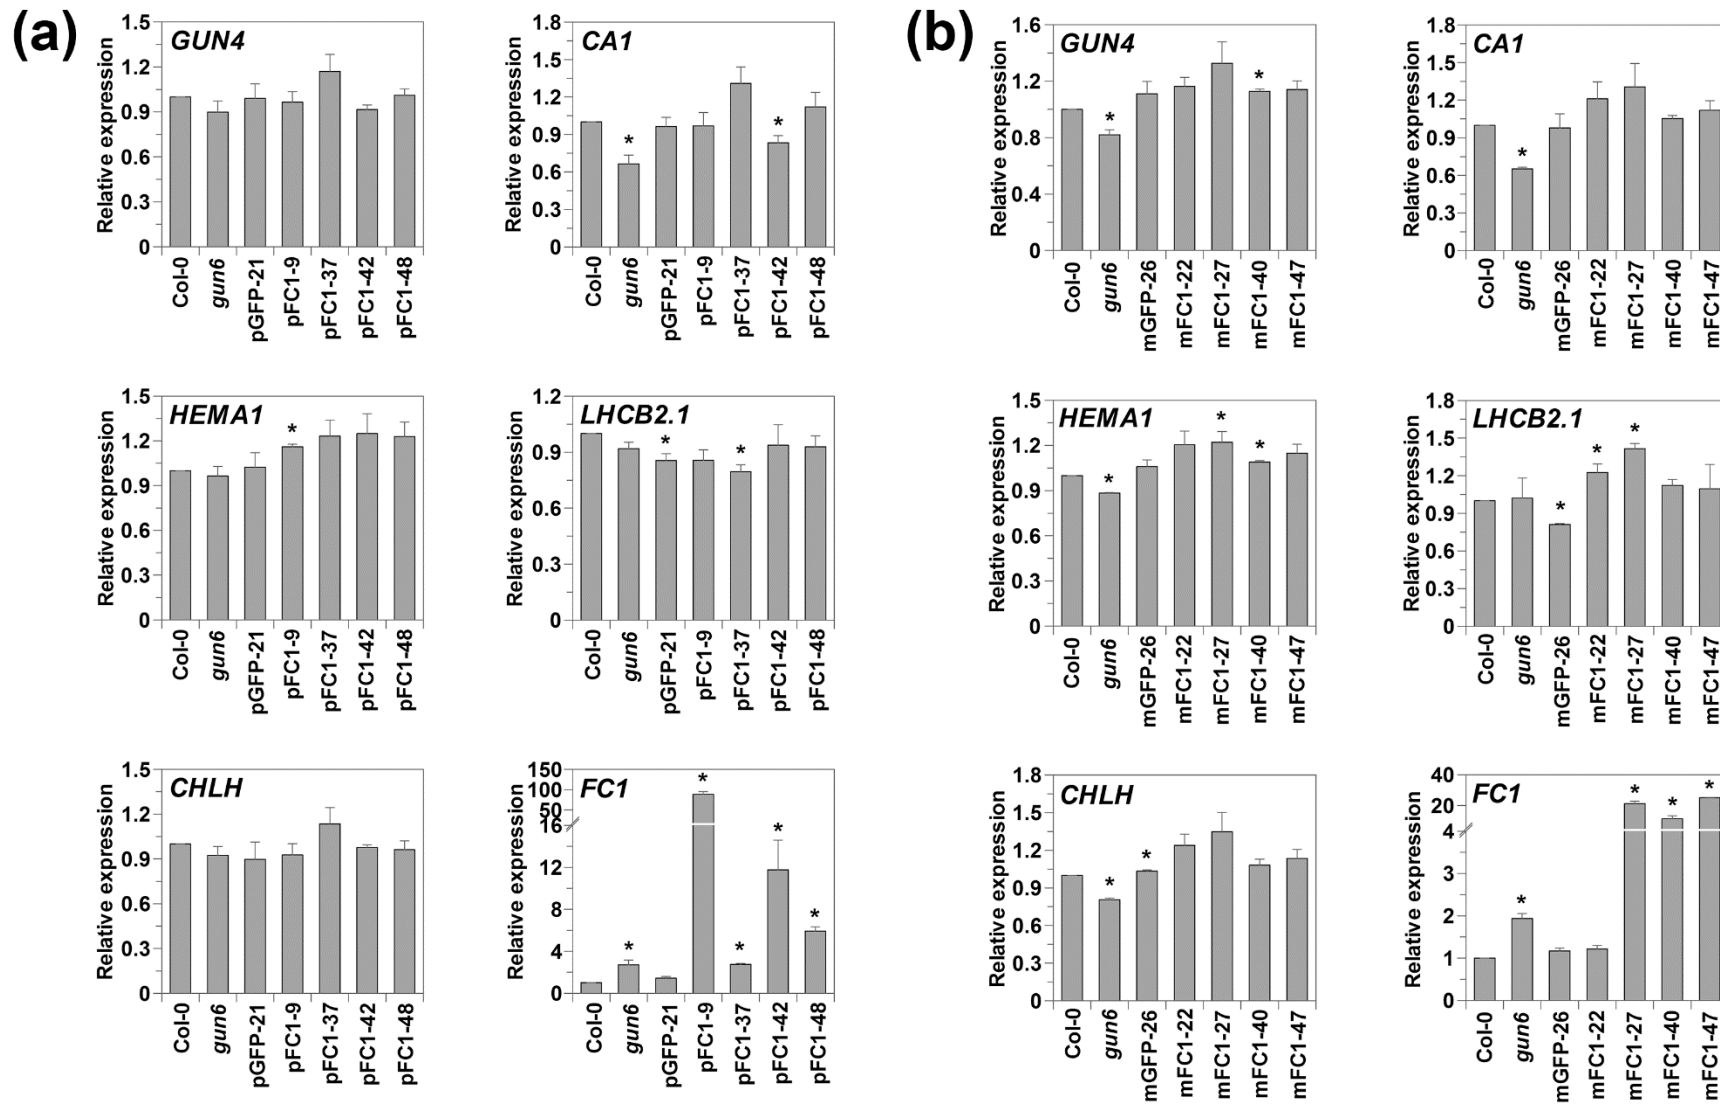

**Figure S12. Increased *FC1* expression does not confer elevated nuclear gene expression in dark-grown seedlings.** (a,b) The expression of *GUN4*, *CA1*, *HEMA1*, *LHCB2.1*, *CHLH* and *FC1* was determined by qRT-PCR in pFC1 (a) and mFC1 (b) seedlings grown for 4 d in the dark. Data shown is the mean + SEM of three independent biological replicates and asterisks denote a significant difference vs. Col-0 ( $p < 0.05$ , Student's *t*-test).



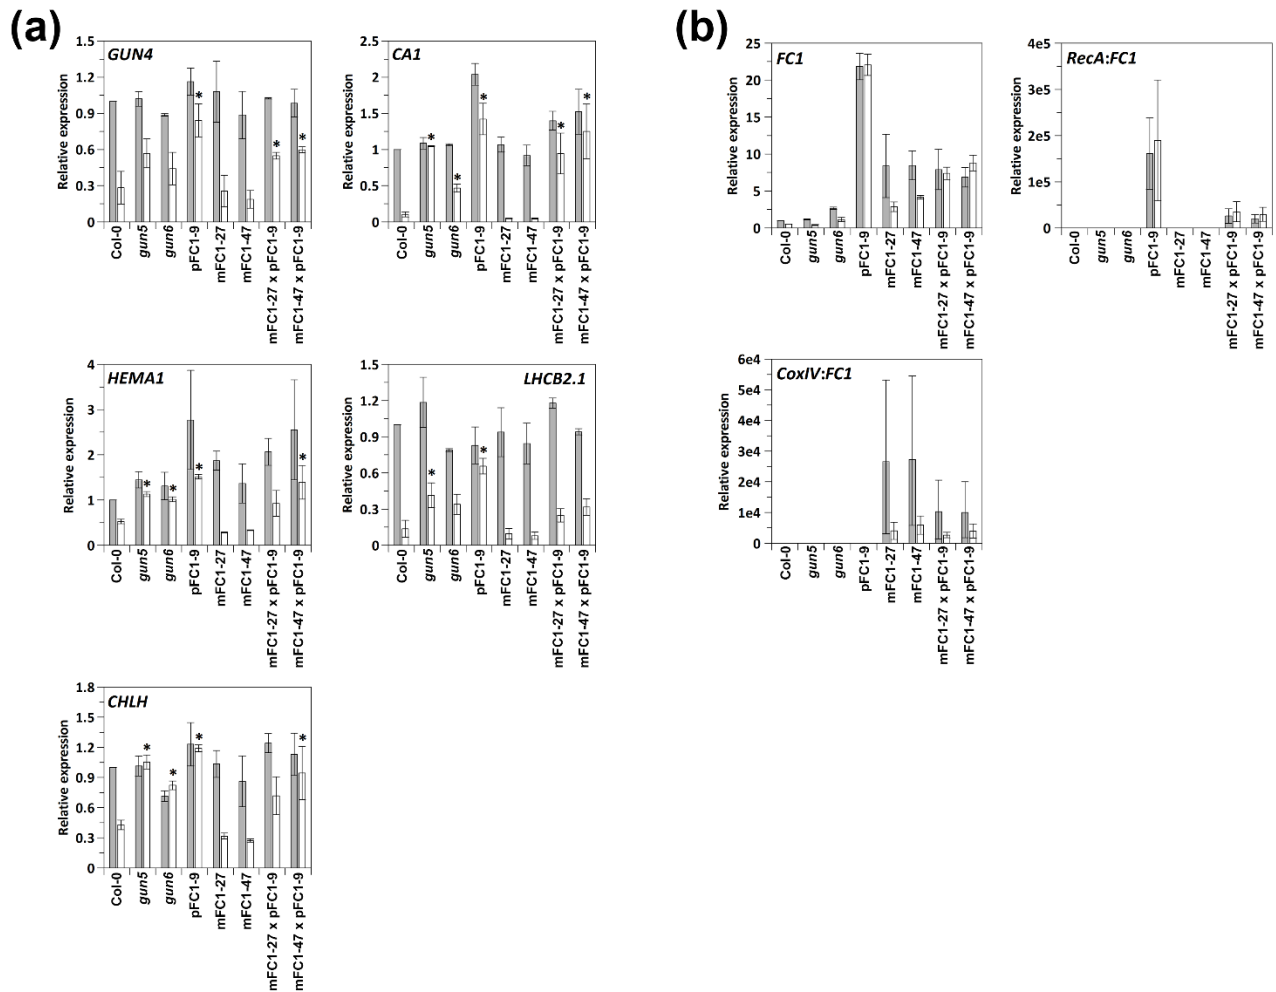

**Figure S13. *FC1* overexpression in crosses of pFC1 and mFC1 transgenic lines.** (a,b) Analysis of gene expression by qRT-PCR in F<sub>1</sub> seedlings derived from a cross between pFC1-9 and mFC1-27, or pFC1-9 and mFC1-47 was assessed in the absence (grey bars) or presence (white bars) of NF by qRT-PCR. The parent lines pFC1-9, mFC1-27 and mFC1-47, as-well-as *gun5* and *gun6*, were included as controls. Expression of *GUN4*, *CA1*, *HEMA1*, *LHC2.1* and *CHLH* (a) and total, plastid-targeted (*RecA:FC1*) and mitochondria-targeted (*CoxIV:FC1*) *FC1* (b) is shown relative to Col-0. Data shown is the mean  $\pm$  range of two independent biological replicates and asterisks denote a significant enhancement of nuclear gene expression vs. Col-0 +NF (determined as no overlap of the 95% confidence limits).

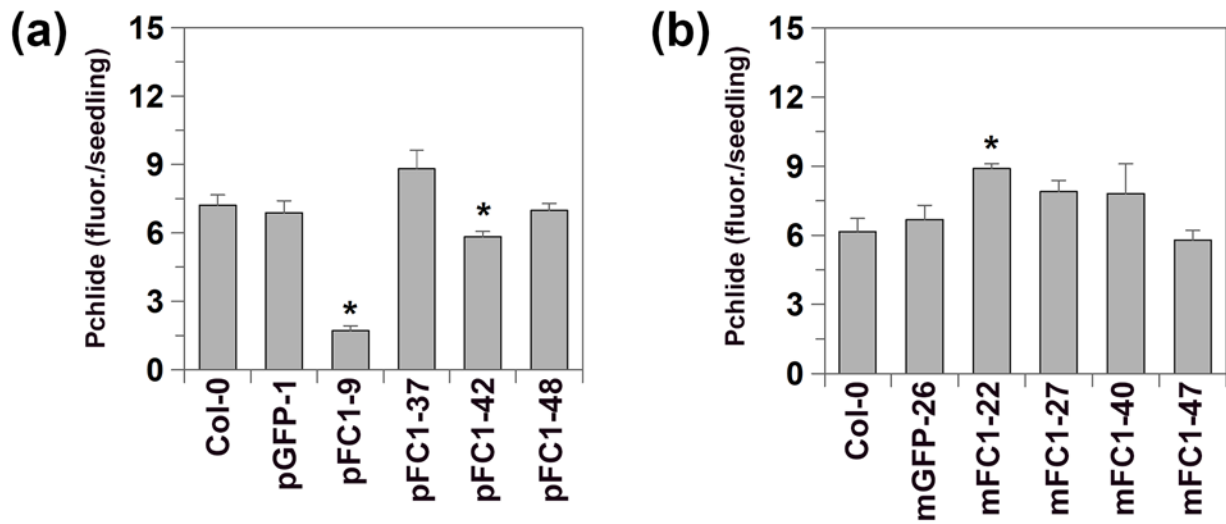

**Figure S14. Protochlorophyllide is reduced in pFC1 lines.** (a,b) Protochlorophyllide (Pchlide) content of pFC1 (a) and mFC1 (b) seedlings grown for 4 d in the dark. Data shown is the mean + SEM of three independent biological replicates and asterisks indicate a significant difference in percentage change vs. Col-0 for the same treatment (ANOVA, followed by Tukey's test).

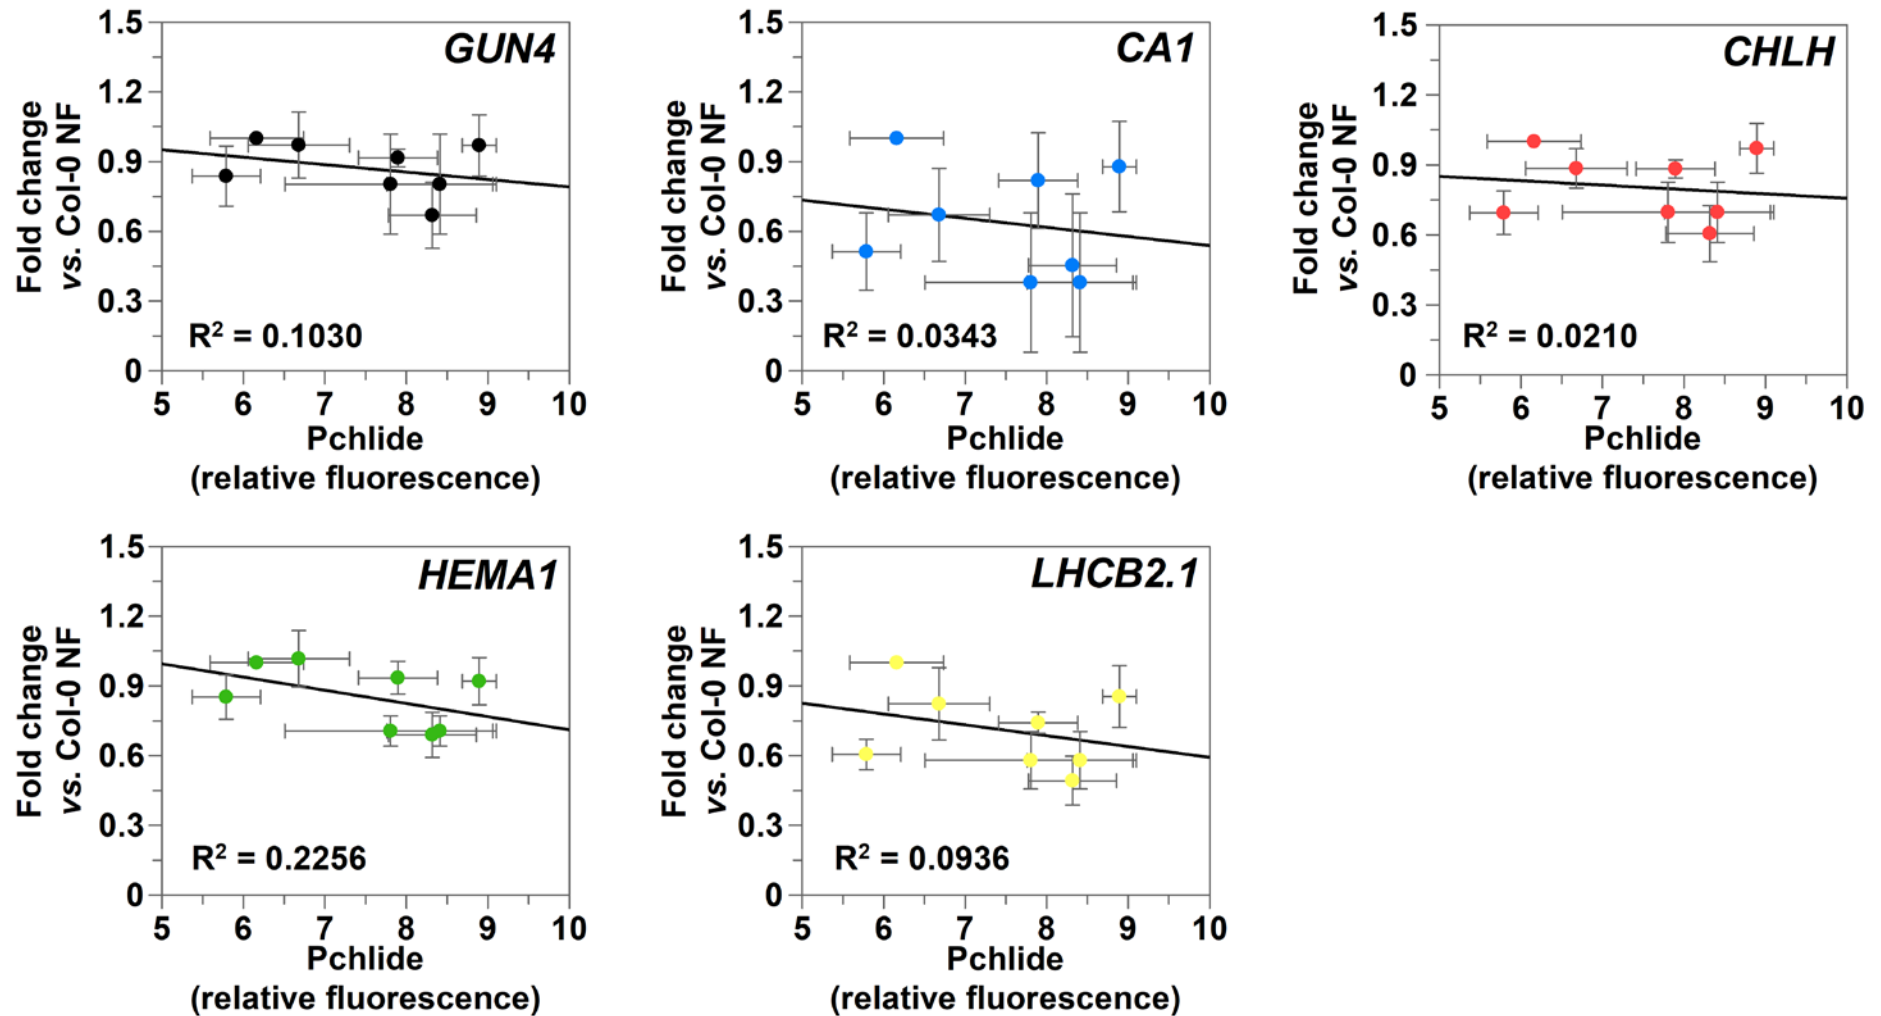

**Figure S15. Enhancement of nuclear gene expression on NF does not correlate with protochlorophyllide levels in dark-grown mFC1 seedlings.** Correlation plots of protochlorophyllide (Pchlide) in 4 d-old dark-grown mFC1 seedlings and against fold change in expression of *GUN4*, *CA1*, *HEMA1*, *LHCB2.1*, and *CHLH* vs. Col-0 on NF. Data represent the mean  $\pm$  SEM of three independent biological replicates.
